# Supplementary material for: The protective effect of hydroxytyrosol acetate against inflammation of vascular endothelial cells partly through the SIRT6-mediated PKM2 signaling pathway
Source: Royal Society of Chemistry journal article supplement (doi:10.1039/c9fo00586b), 2019-01-01
Supplement: c9fo00586b3.pdf [file c9fo00586b3.pdf]

### Supplementary Material

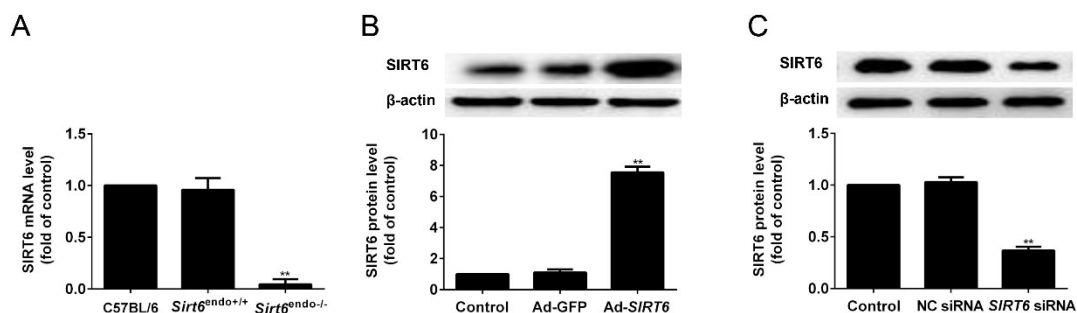

**Fig. S1.** Knockout, Knockdown and overexpression efficiency of SIRT6. (A) Total RNA samples from aortic intima of *Sirt6*<sup>endo-/-</sup> mice were extracted. The expression of SIRT6 mRNA was measured by quantitative real-time PCR. (B) The HUVECs were transfected with *SIRT6* siRNA or NC siRNA for 48 h. The SIRT6 expression was determined by Western blotting. (C) The HUVECs were infected with *SIRT6* adenovirus vector for 48 h. The expression of SIRT6 protein was measured by Western blotting. \*\* $P < 0.01$  vs control group. Results are expressed as mean $\pm$ SEM (n=3).
